# Supplementary material for: Gut microbiota influences onset of foraging-related behavior but not physiological hallmarks of division of labor in honeybees
Source: PubMed Central journal article supplement (PMC11389387; doi:10.1128/mbio.01034-24), 2024-07-29

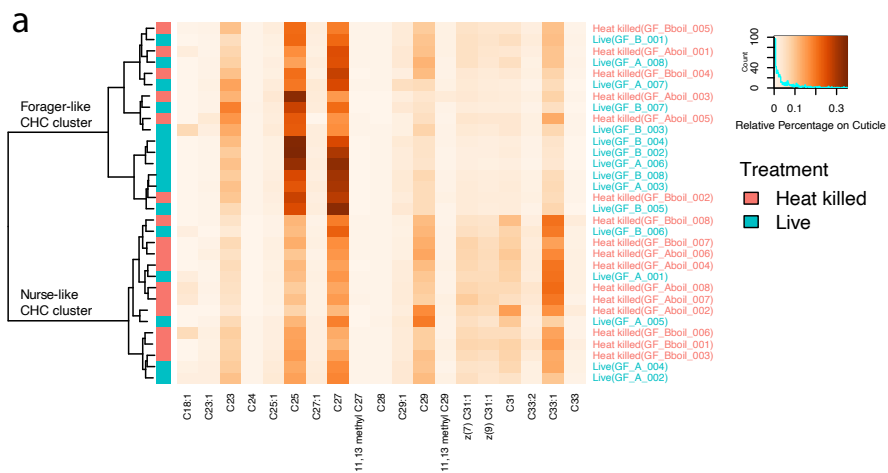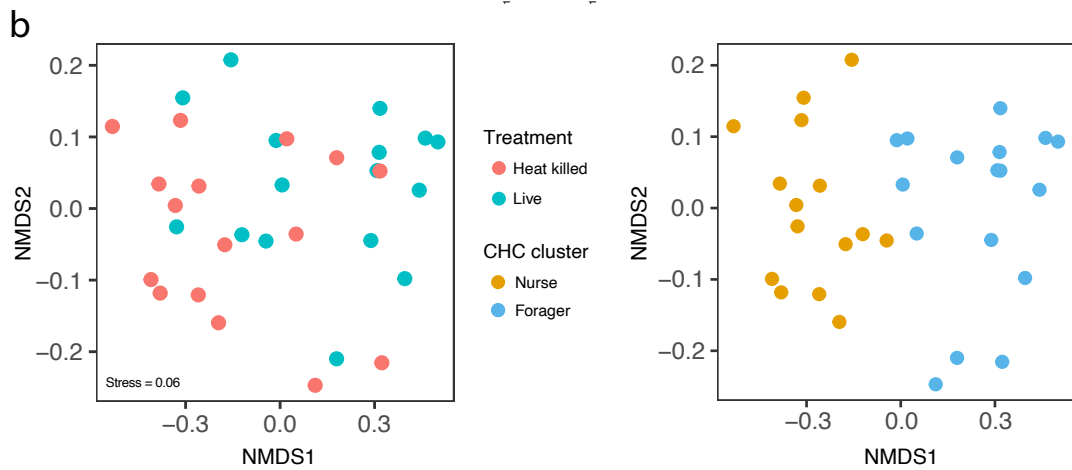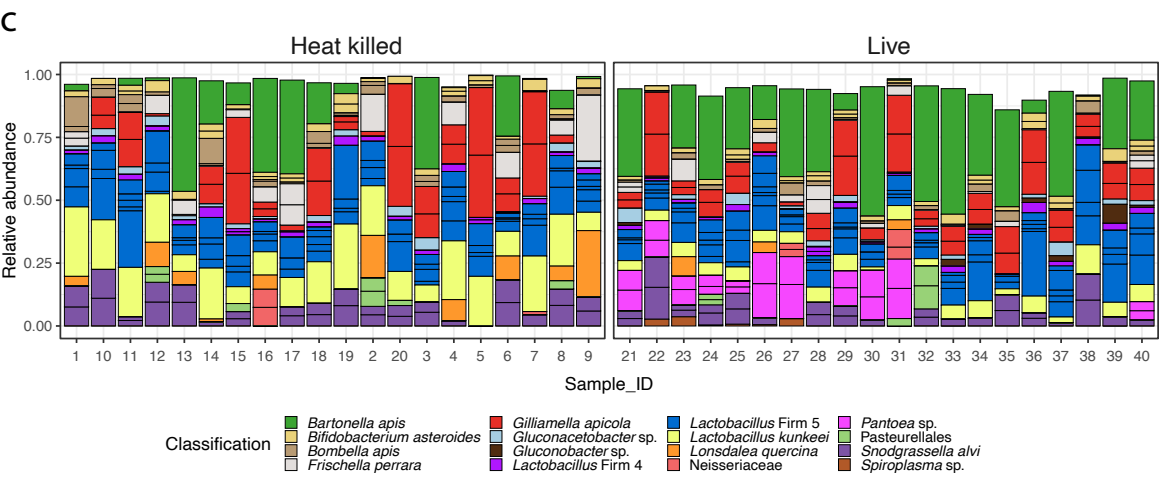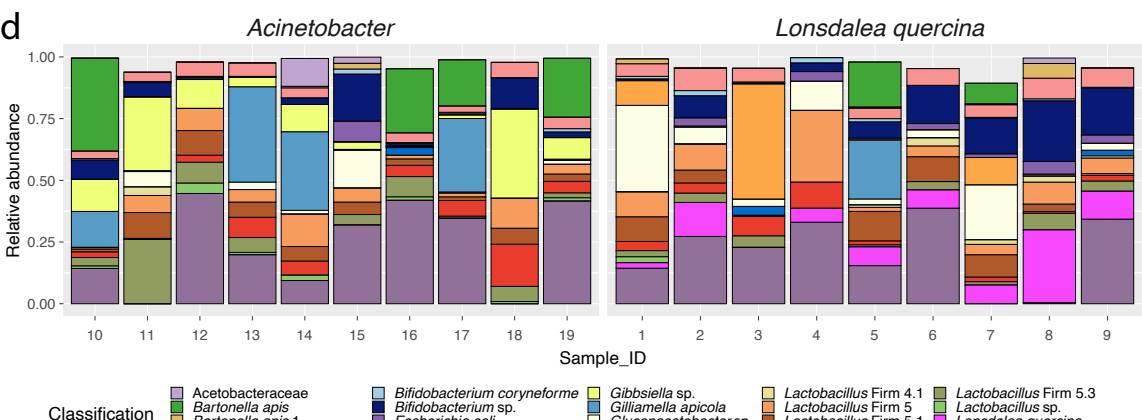

Supplement: mbio.01034-24-s0002.pdf [file mbio.01034-24-s0002.pdf]
